# Supplementary material
Source: Frontiers journal article supplement (https://www.frontiersin.org/articles/117051)
Supplement: Table_1.PDF [file Table_1.PDF]

**Supplementary Table 1.** Transcriptomic data for the five zones of the *A. thaliana* root. A gene was considered to be expressed if its expression was greater than 100 and differentially expressed if a t-test between two zones was significant at a q-value of 0.05.

| Total                                        | Zone 1            | Zone 2              | Zone 3          | Zone 4         | Zone 5           |
|----------------------------------------------|-------------------|---------------------|-----------------|----------------|------------------|
| Expressed                                    | 7741 (36.3%)      | 7539 (35.3%)        | 7801 (36.6%)    | 7854 (36.8%)   | 8044 (37.7%)     |
|                                              | Z1→Z2             | Z2→Z3               | Z3→Z4           | Z4→Z5          | Z5→Z1            |
| DE                                           | 1632(up) 1939(dn) | 1343 (up) 1750 (dn) | 155/369         | 155/184        | 1322/2627        |
| TF: 1574 annotated genes on the array        |                   |                     |                 |                |                  |
| Expressed                                    | 349 (22.2%)       | 366 (23.3%)         | 408 (25.9%)     | 401 (25.5%)    | 392 (24.9%)      |
| DE                                           | 46/83             | 99/42               | 5/19            | 8/9            | 73/82            |
| Cell Wall: 1043 annotated genes on the array |                   |                     |                 |                |                  |
| Expressed                                    | 367 (35.2%)       | 426 (40.8%)         | 415 (39.8%)     | 407 (39.0%)    | 402 (38.5%)      |
| DE                                           | 147/40            | 65/110              | 15/33           | 15/23          | 63/86            |
| ROS: 100 annotated genes on the array        |                   |                     |                 |                |                  |
| Expressed                                    | 21 (21.0%)        | 36 (36.0%)          | 52 (52.0%)      | 48 (48.0%)     | 48 (48.0%)       |
| DE                                           | 5/2               | 14/5                | 1/5             | 1/5            | 5/4              |
| AQP: 30 annotated genes on the array         |                   |                     |                 |                |                  |
| Expressed                                    | 8 (26.7%)         | 17 (56.7%)          | 19 (63.3%)      | 17 (56.7%)     | 17 (56.7%)       |
| DE                                           | 7/0               | 7/2                 | 0/4             | 0/3            | 6/1              |
| Hormone: 999 annotated genes on the array    |                   |                     |                 |                |                  |
| Expressed                                    | 383 (38.3%)       | 423 (42.3%)         | 476 (47.6%)     | 473 (47.3%)    | 492 (49.2%)      |
| DE                                           | 85 (up) 78 (dn)   | 94 (up) 82 (dn)     | 10 (up) 20 (dn) | 16 (up) 8 (dn) | 92 (up) 115 (dn) |
